# Supplementary material for: Effect of an extruded animal protein‐free diet on fecal microbiota of dogs with food‐responsive enteropathy
Source: PubMed Central journal article supplement — J Vet Intern Med. 2018 Oct 23;32(6):1903–10. doi: 10.1111/jvim.15227 (PMC6271313; doi:10.1111/jvim.15227), 2018-10-23
Supplement: JVIM-32-1903-s001.pdf [file JVIM-32-1903-s001.pdf]

**Suppl. 1: Ingredients of the animal protein-free diet used in this study.**

The chemical composition of the diet (as fed) was as follows: water 44 g/kg, crude protein 210 g/kg, crude fat 130 g/kg, crude ashes 49.7 g/kg, starch 345 g/kg, crude fibre 21.5 g/kg. Analyses of the kibbles were performed according to the AOAC International standard methods (AOAC, 2000; method 950.46 for water, method 954.01 for CP, method 920.39 for ether extract, method 920.40 for starch, method 942.05 for crude ash and method 962.09 for crude fibre).

| <b>Animal protein-free diet</b> |                                                                                                                                                                                                                                                                                                                                                                                     |                                                                                                                                                                                                                                                                                                                                                                                                                                                                                                            |
|---------------------------------|-------------------------------------------------------------------------------------------------------------------------------------------------------------------------------------------------------------------------------------------------------------------------------------------------------------------------------------------------------------------------------------|------------------------------------------------------------------------------------------------------------------------------------------------------------------------------------------------------------------------------------------------------------------------------------------------------------------------------------------------------------------------------------------------------------------------------------------------------------------------------------------------------------|
| Composition                     | Maize<br>Corn gluten<br>Potato protein<br>Animal fat<br>Mineral salts<br>Flaxseed                                                                                                                                                                                                                                                                                                   | Fish oil<br>Sunflower oil<br>Dried beet pulp<br>Dried yeast<br>Dried chicory pulp<br>Fructooligosaccharide<br><i>Yucca</i> extract                                                                                                                                                                                                                                                                                                                                                                         |
| Analytical Component            | Crude protein 21.5%<br>Oils and fats 15.5%<br>Raw fibre 2.5%<br>Crude ash 6%<br>Calcium 0.9%<br>Phosphorus 0.8%                                                                                                                                                                                                                                                                     | Magnesium 0.08%<br>Potassium 0.6%<br>Omega 6 Total 3.4%<br>Omega 3 Total 0.52%<br>EPA-DHA: 0.37%                                                                                                                                                                                                                                                                                                                                                                                                           |
| Nutritional additives           | Vitamin A 22,500 IU/kg<br>Vitamin D 1,800 IU/kg<br>Vitamin E 500 mg/kg<br>Vitamin B1 1.3 mg/kg<br>Vitamin B2 6 mg/kg<br>Vitamin B12 0.03 mg/kg<br>Nicotinic acid 14 mg/kg<br>Folic acid 0.24 mg/kg<br>Pantothenic acid 13 mg/kg<br>Vitamin C 200 mg/kg<br>Biotin 0.28 mg/kg<br>Carnitine 200 mg/kg<br>Taurine 2000 mg/kg<br>Ferrous sulphate monohydrate 350 mg/kg (105 mg iron/kg) | Ferrous chelate of amino acids hydrate 200 mg/kg (32 mg iron/kg)<br>Cupric sulphate pentahydrate 48 mg/kg (copper 12 mg/kg)<br>Manganous sulphate monohydrate 21 mg/kg (manganese 6.5 mg/kg)<br>Manganous chelate of amino acids hydrate 200 mg/kg (manganese 32 mg/kg)<br>Zinc sulphate monohydrate 500 mg/kg (175 mg zinc/kg)<br>Zinc chelate of amino acids hydrate 200 mg/kg (zinc 36 mg/kg)<br>Calcium iodate, anhydrous 40 mg/kg (4 mg iodine/kg)<br>Sodium selenite 34 mg/kg (0.34 mg selenium/kg). |
|                                 | Additives Antioxidants                                                                                                                                                                                                                                                                                                                                                              |                                                                                                                                                                                                                                                                                                                                                                                                                                                                                                            |
| Metabolizable energy            |                                                                                                                                                                                                                                                                                                                                                                                     | 3,700 kcal/kg                                                                                                                                                                                                                                                                                                                                                                                                                                                                                              |
