# Supplementary material for: Effect of an extruded animal protein‐free diet on fecal microbiota of dogs with food‐responsive enteropathy
Source: PubMed Central journal article supplement — J Vet Intern Med. 2018 Oct 23;32(6):1903–10. doi: 10.1111/jvim.15227 (PMC6271313; doi:10.1111/jvim.15227), 2018-10-23
Supplement: JVIM-32-1903-s002.pdf [file JVIM-32-1903-s002.pdf]

**Suppl. 2: Drop-in/drop-off flowchart**

A) Disease dogs: A total of 58 possible cases were identified and recruited. Of those, 10 fulfilled the inclusion criteria and had a positive response to the dietary treatment; they were therefore enrolled in the study. Twelve dogs were excluded because they were diagnosed with concomitant disorders. Thirty-six dogs met the inclusion criteria and were fed with the animal protein-free-diet, but were withdrawn during the two-month period.

*GI, gastrointestinal; FRE, food-responsive enteropathies; ARE, antibiotic-responsive enteropathies; IRE, immunosuppressant-responsive enteropathies.*

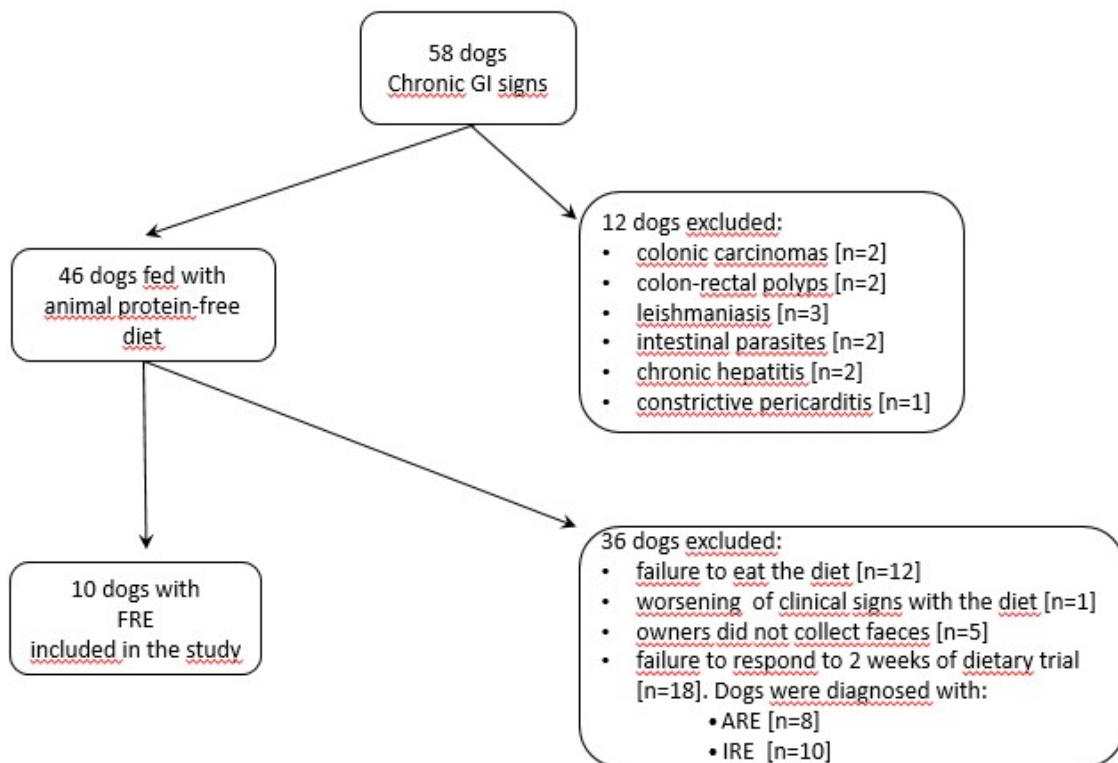

B) Healthy control dogs: Twenty-two healthy dogs met the inclusion criteria. Of these, 14 were enrolled in the study and 8 were excluded.
