# Supplementary material for: Effect of an extruded animal protein‐free diet on fecal microbiota of dogs with food‐responsive enteropathy
Source: PubMed Central journal article supplement — J Vet Intern Med. 2018 Oct 23;32(6):1903–10. doi: 10.1111/jvim.15227 (PMC6271313; doi:10.1111/jvim.15227), 2018-10-23
Supplement: JVIM-32-1903-s003.pdf [file JVIM-32-1903-s003.pdf]

**Suppl. 3: Results of haematology and serum biochemistry assays in dogs with food-responsive enteropathy (FRE).**

*N*, number of dogs; *Min.*, minimum; *Max.*, maximum; *RR*, reference interval; *AST*, aspartate aminotransferase; *ALT*, alanine aminotransferase; *SAP*, serum alkaline phosphatase; *BUN*, blood urea nitrogen; *TLI*, trypsin like immunoreactivity; *PLI*, specific pancreatic lipase immunoreactivity; *RR*, reference range; (\*) normal urine specific gravity and normal urinary sediment; (\*\*) normal protrombin time and activated partial thromboplastin time.

| Variable                          | N  | Median    | Range     |           | Normal value | Above RR | Below RR | RR                  |
|-----------------------------------|----|-----------|-----------|-----------|--------------|----------|----------|---------------------|
|                                   |    |           | Min.      | Max.      |              |          |          |                     |
| Haemoglobin gr %                  | 10 | 16.15     | 14        | 18        | 10           | 0        | 0        | 12-18               |
| Haematocrit %                     | 10 | 46.5      | 41        | 53        | 10           | 0        | 0        | 37-55               |
| Red blood cells/mm <sup>3</sup>   | 10 | 7,000,000 | 6,360,000 | 7,610,000 | 10           | 0        | 0        | 5,500,000-8,500,000 |
| Platelets/mm <sup>3</sup>         | 10 | 252,000   | 194,000   | 500,000   | 10           | 0        | 0        | 160,000-500,000     |
| White blood cells/mm <sup>3</sup> | 10 | 9,540     | 6,150     | 19,070    | 9            | 1        | 0        | 6,000-17,000        |
| Lymphocytes/mm <sup>3</sup>       | 10 | 2,350     | 1,450     | 3,180     | 10           | 0        | 0        | 1,000-4,800         |
| Monocytes/mm <sup>3</sup>         | 10 | 495       | 250       | 1,290     | 10           | 0        | 0        | 100-1,400           |
| Neutrophils/mm <sup>3</sup>       | 10 | 5,980     | 2,950     | 14,770    | 9            | 1        | 0        | 3,000-12,000        |
| Eosinophil/mm <sup>3</sup>        | 10 | 480       | 40        | 1,150     | 8            | 2        | 0        | 0-750               |
| Basophil/mm <sup>3</sup>          | 10 | 90        | 40        | 380       | 9            | 1        | 0        | 0-180               |
| AST U/l                           | 10 | 34.5      | 20        | 109       | 9            | 1        | 0        | 20-42               |
| ALT U/l                           | 10 | 35.5      | 22        | 129       | 9            | 1        | 0        | 20-55               |
| SAP U/l                           | 10 | 191.5     | 79        | 391       | 5            | 5        | 0        | 42-180              |
| Creatinine mg/dl                  | 10 | 1.09      | 0.9       | 1.47      | 6            | 4        | 0        | 0.65-1.35           |
| BUN mg/dl                         | 10 | 26.21     | 16.58     | 47.58     | 10           | 0        | 0        | 18-55               |
| Glucose mg/dl                     | 10 | 86        | 64        | 102       | 10           | 0        | 0        | 70-125              |
| Total protein g/dl                | 10 | 6.625     | 5.89      | 7.14      | 10           | 0        | 0        | 5.6-7.9             |
| Albumin g/dl                      | 10 | 3.165     | 3.01      | 3.65      | 10           | 0        | 0        | 2.8-3.7             |
| Sodium mEq/l                      | 10 | 145.5     | 144       | 150       | 10           | 0        | 0        | 143-154             |
| Potassium mEq/l                   | 10 | 4.55      | 4         | 4.8       | 10           | 0        | 0        | 3.9-5.3             |
| Chloride mEq/l                    | 8  | 112.5     | 108       | 114       | 8            | 0        | 0        | 108-118             |
| Cholesterol mg/dl                 | 8  | 208.5     | 136       | 355       | 7            | 1        | 2        | 140-350             |
| Total bilirubin mg/dl             | 8  | 0.235     | 0.14      | 0.37      | 8            | 0        | 0        | 0.07-0.34           |
| Folate mcg/l                      | 8  | 5.9       | 2.44      | 14.5      | 4            | 0        | 4        | 6.5-11.5            |
| Cobalamin ng/l                    | 8  | 413.5     | 183       | 1,000     | 5            | 1        | 2        | 250-730             |
| Urinalysis                        | 3  |           |           |           | 3            | 0        | 0        | *                   |
| TLI mg/l                          | 2  |           | 6.3       | 12        | 2            | 0        | 0        | 4.0-35.0            |
| Spec PLI mcg/l                    | 1  | 99        |           |           | 1            | 0        | 0        | 0-200               |
| Basal cortisol mcg/dl             | 1  | 3.1       |           |           | 1            | 0        | 0        | 1-4.8               |
| Blood clotting time               | 1  |           |           |           | 1            | 0        | 0        | **                  |
| <i>D. Immitis</i> Snap Test       | 1  |           |           |           | 1            | 0        | 0        | Neg                 |
