# Supplementary material for: Effect of an extruded animal protein‐free diet on fecal microbiota of dogs with food‐responsive enteropathy
Source: PubMed Central journal article supplement — J Vet Intern Med. 2018 Oct 23;32(6):1903–10. doi: 10.1111/jvim.15227 (PMC6271313; doi:10.1111/jvim.15227), 2018-10-23
Supplement: JVIM-32-1903-s004.pdf [file JVIM-32-1903-s004.pdf]

**Suppl.4:** *Main findings of the abdominal ultrasound.*

| <b>Ultrasonographic findings</b>                                           | <b>Number of dogs/Total</b> |
|----------------------------------------------------------------------------|-----------------------------|
| Diffuse gastro-enteropathy compatible with chronic intestinal inflammation | 6/6                         |
| Diffuse meteorism                                                          | 3/6                         |
| Spleen enlargement or dishomogeneity                                       | 3/6                         |
| Mesenteric lymphnode enlargement                                           | 2/6                         |
| Biliary sludge                                                             | 1/6                         |
