# Supplementary material for: Effect of an extruded animal protein‐free diet on fecal microbiota of dogs with food‐responsive enteropathy
Source: PubMed Central journal article supplement — J Vet Intern Med. 2018 Oct 23;32(6):1903–10. doi: 10.1111/jvim.15227 (PMC6271313; doi:10.1111/jvim.15227), 2018-10-23
Supplement: JVIM-32-1903-s005.pdf [file JVIM-32-1903-s005.pdf]

**Suppl. 5: Clinical scores in FRE and HC dogs**

Clinical scores in FRE and HC dogs at baseline and after 30 or 60 days of treatment with the animal protein-free diet. Data are expressed as median and range; significant *P* values are in bold.

*FRE*, food-responsive enteropathy; *HC*, healthy control; *CIBDAI*, canine inflammatory bowel disease activity index, *FS*, 7-point faecal scoring system; *BCS*, 9-point body condition score; *Max*, maximum; *Min*, minimum.

| Group | Score  | Baseline |       |      | After  |       |      | <i>P</i> Value. |
|-------|--------|----------|-------|------|--------|-------|------|-----------------|
|       |        | Median   | Range |      | Median | Range |      |                 |
|       |        |          | Min.  | Max. |        | Min.  | Max. |                 |
| FRE   | CIBDAI | 5        | 2     | 6    | 2      | 0     | 3    | <b>0.0020</b>   |
|       | FS     | 6        | 2     | 7    | 2      | 2     | 3    | <b>0.0039</b>   |
|       | BCS    | 5        | 4     | 5    | 5      | 3     | 5    | > 0.999         |
| HC    | CIBDAI | 1        | 0     | 1    | 1      | 0     | 1    | > 0.999         |
|       | FS     | 2        | 2     | 3    | 2      | 2     | 3    | > 0.999         |
|       | BCS    | 5        | 4     | 5    | 5      | 4     | 5    | > 0.999         |
