# Supplementary material for: Effect of an extruded animal protein‐free diet on fecal microbiota of dogs with food‐responsive enteropathy
Source: PubMed Central journal article supplement — J Vet Intern Med. 2018 Oct 23;32(6):1903–10. doi: 10.1111/jvim.15227 (PMC6271313; doi:10.1111/jvim.15227), 2018-10-23
Supplement: JVIM-32-1903-s006.pdf [file JVIM-32-1903-s006.pdf]

**Suppl. 6:** *Abundance and statistical differences of different bacterial groups in faecal samples analysed with Illumina sequencing.*

Percentage and statistical differences of bacterial groups in faecal samples analysed via Illumina sequencing are reported as median values and range in FRE dogs and HC before and after the dietary trial. *P* values and adjusted *P* values with Bonferroni correction are reported. Significant results are in bold.

*FRE, food-responsive enteropathy dog; HC, healthy control dogs; Baseline, before dietary trial with animal protein-free-diet; After, after 30 or 60 days of dietary trial animal protein-free-diet; Min., minimum; Max., maximum.*

| Bacterial group                | FRE Baseline      | FRE After         | HC Baseline      | HC After         | FRE Baseline vs HC Baseline |                         | FRE Baseline vs FRE After |                         | HC Baseline vs HC After |                         | FRE After vs HC Baseline |                         |
|--------------------------------|-------------------|-------------------|------------------|------------------|-----------------------------|-------------------------|---------------------------|-------------------------|-------------------------|-------------------------|--------------------------|-------------------------|
|                                |                   |                   |                  |                  | <i>P</i> value              | Adjusted <i>P</i> value | <i>P</i> value            | Adjusted <i>P</i> value | <i>P</i> value          | Adjusted <i>P</i> value | <i>P</i> value           | Adjusted <i>P</i> value |
| <i>g.Actinomyces</i>           | 0(0-0.012)        | 0(0-0.008)        | 0(0-0.018)       | 0(0-0.058)       | 0.514                       | 0.642                   | 0.28                      | 0.611                   | 0.145                   | 0.403                   | 0.904                    | 0.929                   |
| <i>g.Corynebacterium</i>       | 0(0.002-0.036)    | 0(0.002-0.016)    | 0(0-0.026)       | 0(0-1.716)       | 0.341                       | 0.491                   | 0.374                     | 0.611                   | 0.298                   | 0.494                   | 0.789                    | 0.892                   |
| <i>g.Leucobacter</i>           | 0(0-0.004)        | 0(0-0.004)        | 0(0-0.01)        | 0(0-0.048)       | <b>0.044</b>                | 0.127                   | 0.798                     | 0.831                   | 0.201                   | 0.439                   | 0.077                    | 0.263                   |
| <i>f.Micrococcaceae;g_</i>     | 0(0-0.04)         | 0(0-0.006)        | 0(0-0.006)       | 0(0-0.018)       | 0.44                        | 0.579                   | 0.223                     | 0.611                   | 0.095                   | 0.343                   | 0.787                    | 0.892                   |
| <i>g.Arthrobacter</i>          | 0(0-0.004)        | 0(0-0.008)        | 0(0-0.006)       | 0(0-0.136)       | 0.436                       | 0.579                   | 0.244                     | 0.611                   | 0.247                   | 0.468                   | 0.797                    | 0.892                   |
| <i>g.Bifidobacterium</i>       | 0(0.014-0.668)    | 0.1(0.016-12.628) | 0(0.016-17.826)  | 0.2(0.01-4.908)  | 0.334                       | 0.491                   | 0.349                     | 0.611                   | 0.573                   | 0.679                   | 0.66                     | 0.823                   |
| <i>f.Coriobacteriaceae;g_</i>  | 0(0-0.034)        | 0(0-0.008)        | 0(0-0.118)       | 0(0-0.032)       | <b>0.048</b>                | 0.134                   | 0.323                     | 0.611                   | 0.248                   | 0.468                   | 0.053                    | 0.209                   |
| <i>g.Adlercreutzia</i>         | 0(0.002-0.098)    | 0(0-0.05)         | 0(0.002-0.084)   | 0(0-0.244)       | 0.131                       | 0.253                   | 0.23                      | 0.611                   | 0.142                   | 0.403                   | <b>0.021</b>             | 0.12                    |
| <i>g.Collinsella</i>           | 1.4(0.058-7.386)  | 1.5(0.08-4.656)   | 4.7(2.312-11.65) | 4(1.058-19.668)  | <b>0.006</b>                | <b>0.048</b>            | 0.71                      | 0.783                   | 0.56                    | 0.678                   | <b>0.002</b>             | <b>0.03</b>             |
| <i>g.Slackia</i>               | 0(0-0.782)        | 0(0-0.202)        | 0.2(0.004-0.548) | 0.1(0.004-0.224) | <b>0.022</b>                | 0.098                   | 0.344                     | 0.611                   | 0.054                   | 0.264                   | <b>0.015</b>             | 0.12                    |
| <i>g.Bacteroides</i>           | 0.4(0.088-15.498) | 2.4(0.118-7.41)   | 5.9(0.21-16.498) | 5.8(0.37-19.274) | 0.053                       | 0.138                   | 0.645                     | 0.768                   | 0.53                    | 0.652                   | 0.101                    | 0.322                   |
| <i>g.Parabacteroides</i>       | 0(0-3.632)        | 0(0.002-0.616)    | 0(0-0.23)        | 0(0.004-0.388)   | 0.618                       | 0.736                   | 0.43                      | 0.633                   | 0.181                   | 0.422                   | 0.119                    | 0.343                   |
| <i>g.Prevootella</i>           | 0(0.008-2.012)    | 0.2(0.006-4.572)  | 0.1(0.008-1.198) | 0.3(0.004-3.928) | 0.291                       | 0.455                   | 0.099                     | 0.611                   | 0.051                   | 0.264                   | 0.501                    | 0.749                   |
| <i>f.S24.7;g_</i>              | 0(0-0.072)        | 0(0-0.124)        | 0(0-0.038)       | 0(0-0.198)       | <b>0.033</b>                | 0.116                   | 0.154                     | 0.611                   | 0.25                    | 0.468                   | 0.545                    | 0.761                   |
| <i>f.Paraprevotellaceae;g_</i> | 0(0-0.006)        | 0(0-0.034)        | 0(0-0.088)       | 0(0-0.03)        | 0.159                       | 0.285                   | 0.337                     | 0.611                   | 0.159                   | 0.41                    | 0.239                    | 0.561                   |
| <i>g.Prevootella.</i>          | 0(0.002-0.872)    | 0(0.002-1.614)    | 0.3(0.006-2.56)  | 0.2(0.008-2.026) | 0.084                       | 0.18                    | 0.518                     | 0.681                   | 0.948                   | 0.961                   | 0.23                     | 0.555                   |
| <i>g.Mucispirillum</i>         | 0(0-0.002)        | 0(0-0.004)        | 0(0-0.16)        | 0(0-0.098)       | 0.132                       | 0.253                   | 0.726                     | 0.789                   | 0.088                   | 0.343                   | 0.15                     | 0.416                   |

| Bacterial group                          | FRE Baseline      | FRE After          | HC Baseline         | HC After          | FRE Baseline vs HC Baseline |                  | FRE Baseline vs FRE After |                  | HC Baseline vs HC After |                  | FRE After vs HC Baseline |                  |
|------------------------------------------|-------------------|--------------------|---------------------|-------------------|-----------------------------|------------------|---------------------------|------------------|-------------------------|------------------|--------------------------|------------------|
|                                          |                   |                    |                     |                   | P value                     | Adjusted P value | P value                   | Adjusted P value | P value                 | Adjusted P value | P value                  | Adjusted P value |
| <i>g.Bacillus</i>                        | 0(0-0.014)        | 0(0-0.054)         | 0(0-0.06)           | 0(0-0.084)        | 0.236                       | 0.376            | 0.601                     | 0.741            | 0.445                   | 0.579            | 0.43                     | 0.714            |
| <i>f.Planococcaceae;g_</i>               | 0(0-0.004)        | 0(0-0.006)         | 0(0-0.002)          | 0(0-0.018)        | 0.333                       | 0.491            | 0.343                     | 0.611            | 0.101                   | 0.343            | <b>0.018</b>             | 0.12             |
| <i>g.Rummeliibacillus</i>                | 0(0.002-0.202)    | 0(0.006-0.122)     | 0(0.002-0.084)      | 0(0-10.67)        | 0.348                       | 0.492            | 0.47                      | 0.665            | 0.33                    | 0.494            | 0.363                    | 0.65             |
| <i>g.Staphylococcus</i>                  | 0(0-0.024)        | 0(0-0.01)          | 0(0-0.006)          | 0(0-0.08)         | 0.321                       | 0.491            | 0.382                     | 0.611            | 0.18                    | 0.422            | 0.646                    | 0.823            |
| <i>o.Lactobacillales;f_Other;g_Other</i> | 0(0-0.102)        | 0(0-0.006)         | 0(0-0.006)          | 0(0-0.006)        | 0.067                       | 0.158            | 0.123                     | 0.611            | 0.336                   | 0.494            | 0.676                    | 0.823            |
| <i>f.Aerococcaceae;g_</i>                | 0(0-0.006)        | 0(0-0.006)         | 0(0-0.014)          | 0(0-0.004)        | 0.644                       | 0.743            | 0.343                     | 0.611            | 0.256                   | 0.468            | 0.311                    | 0.619            |
| <i>f.Enterococcaceae;g_Other</i>         | 0(0-0.09)         | 0(0-0.006)         | 0(0-0.004)          | 0(0-0.02)         | 0.063                       | 0.152            | 0.072                     | 0.611            | 0.094                   | 0.343            | 0.203                    | 0.525            |
| <i>g.Enterococcus</i>                    | 0.3(0.032-27.068) | 0.2(0.042-0.604)   | 0.1(0.03-0.23)      | 0.1(0.032-1.358)  | 0.074                       | 0.163            | 0.148                     | 0.611            | <b>0.043</b>            | 0.264            | <b>0.014</b>             | 0.12             |
| <i>g.Lactobacillus</i>                   | 0.2(0.062-1.51)   | 0.2(0.078-35.124)  | 0.1(0.048-4.264)    | 0.1(0.054-52.838) | 0.93                        | 0.955            | 0.337                     | 0.611            | 0.38                    | 0.538            | 0.364                    | 0.65             |
| <i>f.Leuconostocaceae;g_</i>             | 0(0-0.006)        | 0(0-0.056)         | 0(0-0.004)          | 0(0-0.024)        | 0.784                       | 0.84             | 0.364                     | 0.611            | 0.311                   | 0.494            | 0.972                    | 0.977            |
| <i>g.Streptococcus</i>                   | 1.6(0.222-38.236) | 7(0.284-60.696)    | 7.7(0.24-34.172)    | 6(0.24-60.11)     | 0.815                       | 0.861            | 0.36                      | 0.611            | 0.247                   | 0.468            | 0.447                    | 0.714            |
| <i>g.Turicibacter</i>                    | 0.3(0.104-23.546) | 0.9(0.136-28.192)  | 0.3(0.1-11.66)      | 1.8(0.102-6.198)  | 0.639                       | 0.743            | 0.676                     | 0.774            | 0.744                   | 0.797            | 0.292                    | 0.608            |
| <i>o.Clostridiales;f_Other;g_Other</i>   | 0.1(0.014-0.734)  | 0.1(0.04-7.186)    | 0.2(0.044-4.238)    | 0.2(0.064-1.418)  | <b>0.04</b>                 | 0.121            | 0.349                     | 0.611            | 0.398                   | 0.552            | 0.253                    | 0.576            |
| <i>o.Clostridiales;f_;g_</i>             | 0.4(0.056-2.398)  | 0.5(0.118-1.202)   | 1.3(0.108-3.79)     | 0.7(0.194-2.818)  | <b>0.04</b>                 | 0.121            | 0.613                     | 0.741            | 0.13                    | 0.403            | <b>0.022</b>             | 0.12             |
| <i>f.Clostridiaceae;g_Other</i>          | 1.5(0.046-6.21)   | 0.9(0.226-2.306)   | 2.4(1.536-3.18)     | 1.3(0.552-2.404)  | 0.178                       | 0.304            | 0.209                     | 0.611            | <b>0.001</b>            | <b>0.024</b>     | <b>0.002</b>             | <b>0.015</b>     |
| <i>f.Clostridiaceae;g_</i>               | 9.5(0.236-34.324) | 10.3(1.998-27.192) | 23.1(13.448-27.514) | 9.2(4.4-21.298)   | <b>0.014</b>                | 0.087            | 0.596                     | 0.741            | <b>0.001</b>            | <b>0.024</b>     | <b>0.001</b>             | <b>0.025</b>     |
| <i>g.Candidatus.Arthromitus</i>          | 0(0-0.01)         | 0(0-1.066)         | 0(0-0.396)          | 0(0.002-0.09)     | 0.672                       | 0.751            | 0.168                     | 0.611            | 0.523                   | 0.652            | 0.284                    | 0.608            |
| <i>g.Clostridium</i>                     | 2.1(0.094-69.628) | 0.4(0.13-23.014)   | 0.4(0.11-6.9)       | 0.3(0.106-6.432)  | 0.412                       | 0.562            | 0.446                     | 0.643            | 0.807                   | 0.853            | 0.447                    | 0.714            |
| <i>g.SMB53</i>                           | 0.1(0.006-0.69)   | 0.1(0.036-0.432)   | 0.6(0.246-0.76)     | 0.3(0.118-0.574)  | <b>0.007</b>                | <b>0.048</b>     | 0.529                     | 0.684            | <b>0.001</b>            | <b>0.024</b>     | <b>&gt;0.001</b>         | <b>0.015</b>     |
| <i>g.Sarcina</i>                         | 0.1(0.014-0.49)   | 0.2(0.02-4.83)     | 0.1(0.012-2.442)    | 0.1(0.018-2.966)  | 0.977                       | 0.977            | 0.27                      | 0.611            | 0.58                    | 0.679            | 0.519                    | 0.749            |
| <i>f.Lachnospiraceae;g_Other</i>         | 0(0.004-0.16)     | 0.1(0.022-0.218)   | 0.1(0.024-0.22)     | 0.1(0.038-0.186)  | <b>0.006</b>                | <b>0.048</b>     | <b>0.007</b>              | 0.555            | <b>0.046</b>            | 0.264            | 0.519                    | 0.749            |
| <i>f.Lachnospiraceae;g_</i>              | 0.8(0.03-3.312)   | 1.4(0.506-2.654)   | 2.8(0.762-15.508)   | 1.5(1.104-2.244)  | <b>0.001</b>                | <b>0.038</b>     | 0.106                     | 0.611            | 0.056                   | 0.264            | <b>0.004</b>             | 0.061            |
| <i>g.Blautia</i>                         | 3.4(0.238-15.334) | 11(1.436-26.83)    | 11.4(2.29-22.65)    | 8.4(3.774-18.424) | <b>0.026</b>                | 0.103            | 0.05                      | 0.611            | 0.405                   | 0.552            | 0.815                    | 0.899            |
| <i>g.Coprococcus</i>                     | 0(0.002-0.064)    | 0.1(0.012-0.886)   | 0.1(0.01-0.178)     | 0(0.032-0.07)     | 0.113                       | 0.231            | 0.195                     | 0.611            | 0.448                   | 0.579            | 0.598                    | 0.787            |
| <i>g.Dorea</i>                           | 0.7(0.048-2.924)  | 1.1(0.31-3.426)    | 1.9(0.44-4.856)     | 1(0.506-2.842)    | <b>0.03</b>                 | 0.114            | 0.786                     | 0.83             | <b>0.044</b>            | 0.264            | <b>0.022</b>             | 0.12             |
| <i>g.Epulpiscium</i>                     | 0(0.004-0.506)    | 0(0.006-0.272)     | 0(0.002-0.034)      | 0(0.002-0.128)    | 0.536                       | 0.659            | 0.741                     | 0.794            | 0.068                   | 0.302            | 0.462                    | 0.722            |
| <i>g.Roseburia</i>                       | 0(0-0.022)        | 0(0.002-0.016)     | 0(0.008-0.506)      | 0(0.002-0.176)    | <b>0.001</b>                | <b>0.038</b>     | 0.126                     | 0.611            | 0.469                   | 0.596            | <b>0.017</b>             | 0.12             |
| <i>g..Ruminococcus.</i>                  | 0.7(0.084-6.294)  | 2(0.298-13.148)    | 1.9(0.87-10.492)    | 3.7(0.698-7.504)  | 0.143                       | 0.262            | 0.407                     | 0.611            | 0.312                   | 0.494            | 0.558                    | 0.761            |

| Bacterial group                     | FRE Baseline      | FRE After         | HC Baseline       | HC After          | FRE Baseline vs HC Baseline |                  | FRE Baseline vs FRE After |                  | HC Baseline vs HC After |                  | FRE After vs HC Baseline |                  |
|-------------------------------------|-------------------|-------------------|-------------------|-------------------|-----------------------------|------------------|---------------------------|------------------|-------------------------|------------------|--------------------------|------------------|
|                                     |                   |                   |                   |                   | P value                     | Adjusted P value | P value                   | Adjusted P value | P value                 | Adjusted P value | P value                  | Adjusted P value |
| <i>g.Peptococcus</i>                | 0(0.002-1.868)    | 0(0.008-0.684)    | 0.3(0.012-1.088)  | 0.1(0.012-2.212)  | <b>0.021</b>                | 0.097            | 0.373                     | 0.611            | 0.697                   | 0.769            | 0.074                    | 0.263            |
| <i>f.Peptostreptococcaceae;g_</i>   | 0.6(0.082-29.942) | 3.2(0.36-22.188)  | 0.7(0.188-12.666) | 0.9(0.274-5.178)  | 0.482                       | 0.613            | 0.682                     | 0.774            | 0.638                   | 0.714            | 0.107                    | 0.322            |
| <i>f.Ruminococcaceae;g_</i>         | 0.2(0.032-2.658)  | 0.6(0.034-13.972) | 0.9(0.12-5.936)   | 1.4(0.19-7.762)   | 0.053                       | 0.138            | 0.236                     | 0.611            | <b>0.04</b>             | 0.264            | 0.38                     | 0.662            |
| <i>g.Faecalibacterium</i>           | 0(0.002-0.294)    | 0.1(0.004-1.848)  | 0.1(0.02-0.812)   | 0.2(0.01-0.982)   | <b>0.035</b>                | 0.119            | 0.211                     | 0.611            | <b>0.021</b>            | 0.26             | 0.558                    | 0.761            |
| <i>g.Oscillospira</i>               | 0(0-0.116)        | 0(0-0.018)        | 0(0-0.026)        | 0(0.002-0.092)    | 0.361                       | 0.502            | 0.27                      | 0.611            | 0.053                   | 0.264            | 0.317                    | 0.619            |
| <i>g.Ruminococcus</i>               | 0(0-0.168)        | 0(0-0.014)        | 0(0-0.046)        | 0(0-0.104)        | 0.226                       | 0.368            | 0.341                     | 0.611            | 0.602                   | 0.684            | 0.514                    | 0.749            |
| <i>f.Veillonellaceae;g_Other</i>    | 0(0-0.002)        | 0(0-0.008)        | 0(0-0.008)        | 0(0-0.022)        | 0.142                       | 0.262            | 0.217                     | 0.611            | 0.136                   | 0.403            | 0.861                    | 0.91             |
| <i>g.Megamonas</i>                  | 0.1(0.036-6.39)   | 0.6(0.052-7.814)  | 0.2(0.064-25.892) | 1.1(0.06-13.266)  | <b>0.005</b>                | <b>0.048</b>     | 0.087                     | 0.611            | 0.415                   | 0.555            | 0.77                     | 0.892            |
| <i>g.Megasphaera</i>                | 0(0.006-0.334)    | 0(0.006-8.538)    | 0(0.004-0.042)    | 0(0.004-2.938)    | 0.701                       | 0.762            | 0.242                     | 0.611            | 0.205                   | 0.439            | 0.681                    | 0.823            |
| <i>g.Phascolarctobacterium</i>      | 0(0-0.018)        | 0(0.002-0.696)    | 0(0.002-0.632)    | 0(0.004-1.08)     | 0.06                        | 0.149            | 0.205                     | 0.611            | 0.051                   | 0.264            | 0.977                    | 0.977            |
| <i>f.Mogibacteriaceae</i>           | 0(0-0.01)         | 0(0-0.002)        | 0(0-0.056)        | 0(0-0.032)        | 0.975                       | 0.977            | 0.108                     | 0.611            | 0.594                   | 0.684            | <b>0.03</b>              | 0.149            |
| <i>f.Erysipelotrichaceae</i>        | 0.2(0.032-2.58)   | 0.5(0.15-2.908)   | 2(0.166-10.02)    | 1.1(0.4-8.456)    | <b>0.006</b>                | <b>0.048</b>     | 0.312                     | 0.611            | 0.839                   | 0.874            | <b>0.047</b>             | 0.205            |
| <i>g.Allobaculum</i>                | 0.1(0.01-2.194)   | 0.2(0.014-2.648)  | 1(0.032-2.03)     | 0.5(0.018-1.068)  | <b>0.006</b>                | <b>0.048</b>     | 0.865                     | 0.865            | <b>0.001</b>            | <b>0.024</b>     | <b>0.005</b>             | 0.061            |
| <i>g.Catenibacterium</i>            | 0.1(0.036-6.684)  | 2.1(0.072-15.33)  | 1(0.236-8.93)     | 3.4(0.16-15.606)  | <b>0.016</b>                | 0.088            | <b>0.028</b>              | 0.611            | 0.155                   | 0.41             | 0.861                    | 0.91             |
| <i>g.Coprobacillus</i>              | 0(0-0.034)        | 0(0-0.018)        | 0(0-0.144)        | 0(0.004-0.032)    | <b>0.016</b>                | 0.088            | 0.506                     | 0.677            | <b>0.037</b>            | 0.264            | <b>0.01</b>              | 0.104            |
| <i>g.Eubacterium.</i>               | 0.3(0.04-8.326)   | 1.5(0.104-16.904) | 1.8(0.124-6.194)  | 3.6(0.2-10.33)    | 0.198                       | 0.33             | 0.112                     | 0.611            | 0.103                   | 0.343            | 0.703                    | 0.837            |
| <i>f.Fusobacteriaceae;g_Other</i>   | 0(0.006-0.436)    | 0.1(0.008-0.38)   | 0.2(0.018-0.71)   | 0.1(0.016-0.284)  | <b>0.018</b>                | 0.089            | 0.607                     | 0.741            | <b>0.017</b>            | 0.252            | 0.107                    | 0.322            |
| <i>g.Fusobacterium</i>              | 2.9(0.07-16.726)  | 0.8(0.102-18.356) | 5.6(0.158-24.274) | 2.5(0.668-14.088) | 0.114                       | 0.231            | 0.849                     | 0.861            | 0.105                   | 0.343            | 0.16                     | 0.428            |
| <i>g.Sutterella</i>                 | 0.2(0.044-1.216)  | 0.2(0.018-0.368)  | 0.3(0.034-2.4)    | 0.5(0.056-2.258)  | 0.578                       | 0.699            | 0.401                     | 0.611            | 0.292                   | 0.494            | 0.219                    | 0.547            |
| <i>g.Campylobacter</i>              | 0(0.002-1.294)    | 0(0.002-0.26)     | 0(0.002-2.122)    | 0(0.006-1.582)    | 0.883                       | 0.92             | 0.398                     | 0.611            | 0.967                   | 0.967            | 0.076                    | 0.263            |
| <i>f.Helicobacteraceae;g_</i>       | 0(0-0.018)        | 0(0-0.004)        | 0(0-0.02)         | 0(0-0.014)        | 0.671                       | 0.751            | 0.482                     | 0.67             | 0.868                   | 0.892            | 0.671                    | 0.823            |
| <i>g.Helicobacter</i>               | 0(0.01-0.35)      | 0(0.006-0.44)     | 0.1(0.01-3.172)   | 0.4(0.02-3.712)   | 0.073                       | 0.163            | 0.82                      | 0.842            | 0.186                   | 0.422            | 0.053                    | 0.209            |
| <i>f.Succinivibrionaceae;g_</i>     | 0(0.006-0.058)    | 0(0.008-0.278)    | 0(0.002-6.924)    | 0(0.004-0.864)    | 0.681                       | 0.751            | 0.39                      | 0.611            | 0.265                   | 0.474            | 0.883                    | 0.92             |
| <i>g.Anaerobiospirillum</i>         | 0(0-0.468)        | 0(0-0.74)         | 0(0-1.534)        | 0(0-0.572)        | 0.168                       | 0.292            | 0.503                     | 0.677            | 0.306                   | 0.494            | 0.348                    | 0.65             |
| <i>g.Succinivibrio</i>              | 0(0-0.004)        | 0(0-0.006)        | 0(0-0.202)        | 0(0-0.006)        | 0.478                       | 0.613            | 0.322                     | 0.611            | 0.331                   | 0.494            | 0.284                    | 0.608            |
| <i>f.Enterobacteriaceae;g_Other</i> | 0(0-0.092)        | 0(0-0.072)        | 0(0-0.004)        | 0(0-0.002)        | <b>0.005</b>                | <b>0.048</b>     | 0.692                     | 0.775            | 0.72                    | 0.783            | 0.322                    | 0.619            |
| <i>f.Enterobacteriaceae;g_</i>      | 13.3(0.09-64.676) | 0.5(0.1-9.076)    | 0.3(0.092-4.13)   | 0.2(0.124-14.256) | <b>0.004</b>                | <b>0.048</b>     | <b>0.023</b>              | 0.611            | 0.367                   | 0.53             | 0.598                    | 0.787            |
| <i>g.Citrobacter</i>                | 0(0-0.008)        | 0(0-0.002)        | 0(0-0.004)        | 0(0-0.016)        | <b>0.007</b>                | <b>0.048</b>     | <b>0.045</b>              | 0.611            | 0.171                   | 0.422            | 0.855                    | 0.91             |

| Bacterial group              | FRE Baseline | FRE After  | HC Baseline | HC After   | FRE Baseline vs HC Baseline |                         | FRE Baseline vs FRE After |                         | HC Baseline vs HC After |                         | FRE After vs HC Baseline |                         |
|------------------------------|--------------|------------|-------------|------------|-----------------------------|-------------------------|---------------------------|-------------------------|-------------------------|-------------------------|--------------------------|-------------------------|
|                              |              |            |             |            | <i>P</i> value              | Adjusted <i>P</i> value | <i>P</i> value            | Adjusted <i>P</i> value | <i>P</i> value          | Adjusted <i>P</i> value | <i>P</i> value           | Adjusted <i>P</i> value |
| <i>f.Pseudomonadaceae;g_</i> | 0(0-0.444)   | 0(0-0.004) | 0(0-0.004)  | 0(0-0.004) | <b>0.024</b>                | 0.099                   | 0.308                     | 0.611                   | 0.336                   | 0.494                   | 0.447                    | 0.714                   |
| <i>g.Anaeroplasm</i>         | 0(0-0.008)   | 0(0-0.002) | 0(0-0.088)  | 0(0-0.278) | <b>0.04</b>                 | 0.121                   | 0.678                     | 0.774                   | 0.228                   | 0.468                   | <b>0.046</b>             | 0.205                   |
