# Supplementary material for: Effect of an extruded animal protein‐free diet on fecal microbiota of dogs with food‐responsive enteropathy
Source: PubMed Central journal article supplement — J Vet Intern Med. 2018 Oct 23;32(6):1903–10. doi: 10.1111/jvim.15227 (PMC6271313; doi:10.1111/jvim.15227), 2018-10-23
Supplement: JVIM-32-1903-s007.pdf [file JVIM-32-1903-s007.pdf]

**Suppl. 7: Abundance and statistical differences of different bacterial groups in faecal samples analysed with qPCR.**

Abundance of different bacterial groups in faecal samples analysed with qPCR are reported as median values and range in FRE and HC dogs before and after the dietary trial. *P* values and adjusted *P* values with Bonferroni correction are reported. Significant results are in bold.

*FRE*, food-responsive enteropathy dog; *HC*, healthy control dogs; *Baseline*, before dietary trial with vegetable-diet; *After*, after 30 or 60 days of dietary trial with vegetable-diet; *Min.*, minimum; *Max.*, maximum.

| Bacterial group              | FRE Baseline    | FRE After      | HC Baseline    | HC After       | FRE Baseline   |                         | FRE Baseline   |                         | HC Baseline    |                         | FRE After      |                         |
|------------------------------|-----------------|----------------|----------------|----------------|----------------|-------------------------|----------------|-------------------------|----------------|-------------------------|----------------|-------------------------|
|                              |                 |                |                |                | vs             |                         | vs             |                         | vs             |                         | vs             |                         |
|                              |                 |                |                |                | HC Baseline    |                         | FRE After      |                         | HC After       |                         | HC Baseline    |                         |
|                              |                 |                |                |                | <i>P</i> value | Adjusted <i>P</i> value |
| Universal                    | 11.7(11.5-12.0) | 11.8(8.6-12.1) | 11.7(8.2-12.3) | 11.8(8.3-12.1) | 0.9314         | >0.999                  | 0.6074         | >0.999                  | 0.7148         | >0.999                  | 0.5458         | >0.999                  |
| <i>Faecalibacterium</i> spp. | 6.6(4.4-7.5)    | 7.0(5.0-8.4)   | 7.1(6.3-8.0)   | 7.3(4.4-8.2)   | 0.0956         | 0.7648                  | 0.084          | 0.672                   | 0.0934         | 0.7472                  | 0.5848         | >0.999                  |
| <i>Turicibacter</i> spp.     | 5.1(3.4-8.5)    | 7.0(4.6-8.4)   | 6.7(5.7-7.9)   | 7.5(4.5-7.9)   | 0.0841         | 0.6728                  | 0.3223         | >0.999                  | 0.4631         | >0.999                  | 0.7088         | >0.999                  |
| <i>Streptococcus</i> spp.    | 5.9(5.2-8.9)    | 8.1(5.1-9.0)   | 8.0(5.5-8.6)   | 8.0(6.0-9.1)   | 0.2125         | >0.999                  | <b>0.0273</b>  | 0.2184                  | 0.2166         | >0.999                  | 0.2847         | >0.999                  |
| <i>E. coli</i>               | 8.5(4.2-9.1)    | 7.0(5.2-8.2)   | 6.9(4.0-8.4)   | 6.9(4.3-8.7)   | <b>0.026</b>   | 0.208                   | 0.084          | 0.672                   | 0.391          | >0.999                  | 0.7088         | >0.999                  |
| <i>Blautia</i> spp.          | 9.1(6.7-9.6)    | 9.6(7.9-10.1)  | 9.6(8.2-10.1)  | 9.4(8.7-9.7)   | <b>0.0038</b>  | <b>0.0304</b>           | <b>0.0371</b>  | 0.2968                  | 0.1189         | 0.9512                  | 0.9314         | >0.999                  |
| <i>Fusobacterium</i> spp.    | 7.9(6.2-9.5)    | 8.5(6.3-9.5)   | 8.8(6.8-10.1)  | 8.6(7.2-9.7)   | 0.0956         | 0.7648                  | 0.8457         | >0.999                  | 0.5416         | >0.999                  | 0.2591         | >0.999                  |
| <i>Hiranonis</i> spp.        | 5.5(0.9-6.4)    | 5.7(0.9-6.3)   | 6.0(5.8-6.7)   | 5.9(5.4-6.4)   | <b>0.0155</b>  | 0.124                   | 0.625          | >0.999                  | 0.1937         | >0.999                  | <b>0.0185</b>  | 0.148                   |
